# Supplementary material for: Phytochrome-interacting factors directly suppress MIR156 expression to enhance shade-avoidance syndrome in Arabidopsis
Source: PubMed Central journal article supplement (PMC5570905; doi:10.1038/s41467-017-00404-y), 2017-08-24
Supplement: 41467_2017_404_MOESM1_ESM.pdf [file 41467_2017_404_MOESM1_ESM.pdf]

**File name:** Supplementary Information

**Description:** Supplementary Figures, Supplementary Tables and Supplementary References

**File name:** Supplementary Data 1

**Description:** Dataset for two-way ANOVA analysis

**File name:** Peer Review File

**Description:**

**Supplementary Table 1. Primers Sequences Used in This Study**

| Primer ID | Primer Sequence (5'→3')                     | Purpose                                                           |
|-----------|---------------------------------------------|-------------------------------------------------------------------|
| JG01      | ATTATGCCTCTCCCGAATTCATGCATCATTTTGTCCCTGAC   | Cloning <i>PIF1</i> coding region into pJG4-5 vector for Y1H      |
| JG02      | TTCTCGAGTCGGCCGAATCTTAACCTGTTGTGTGGTTTC     |                                                                   |
| JG03      | ATTATGCCTCTCCCGAATTCATGCCTCTGTTTGTAGCTTTTC  | Cloning <i>PIF3</i> coding region into pJG4-5 vector for Y1H      |
| JG04      | TTCTCGAGTCGGCCGAATCTCACGACGATCCACAAAACCTG   |                                                                   |
| JG05      | ATTATGCCTCTCCCGAATTCATGGAACACCAAGGTTGGAG    | Cloning <i>PIF4</i> coding region into pJG4-5 vector for Y1H      |
| JG06      | TTCTCGAGTCGGCCGAATCCTAGTGGTCCAACGAGAACCG    |                                                                   |
| JG07      | ATTATGCCTCTCCCGAATTCATGGAACAAGTGTTTGCTG     | Cloning <i>PIF5</i> coding region into pJG4-5 vector for Y1H      |
| JG08      | TTCTCGAGTCGGCCGAATCTCAGCCTATTTTACCCATATG    |                                                                   |
| U01       | ATTCGAGCTCGGTACCCGGG AGTGACAGATCCAACGGCAG   | Cloning <i>MIR156A</i> promoter into pLacZi2 $\mu$ vector for Y1H |
| U02       | TCGACAGATCCCCGGGGTTTCTTTGCGTTTCTCTTGTC      |                                                                   |
| U03       | ATTCGAGCTCGGTACCCGGG ATAAGTGCAGAGTCTAAGAC   | Cloning <i>MIR156B</i> promoter into pLacZi2 $\mu$ vector for Y1H |
| U04       | TCGACAGATCCCCGGGGTTTCTCTGTTGCATTCCTC        |                                                                   |
| U05       | ATTCGAGCTCGGTACCCGGG CAGTGCCCTGAATGGATTACAC | Cloning <i>MIR156C</i> promoter into pLacZi2 $\mu$ vector for Y1H |
| U06       | TCGACAGATCCCCGGGGAGAGGAGAAGAGAGGAAG         |                                                                   |
| U07       | ATTCGAGCTCGGTACCCGGG TAACTCTCTCTCTCTCTCTC   | Cloning <i>MIR156D</i> promoter into pLacZi2 $\mu$ vector for Y1H |
| U08       | TCGACAGATCCCCGGGACTTCTTTCCCCATCAACA         |                                                                   |
| U09       | ATTCGAGCTCGGTACCCGGG CTCAACATTTCCGGTTGACTAC | Cloning <i>MIR156E</i> promoter into pLacZi2 $\mu$ vector for Y1H |
| U10       | TCGACAGATCCCCGGGCCTCCTAATTACCTTTCACAC       |                                                                   |
| U11       | ATTCGAGCTCGGTACCCGGG GACACATCCACAACCACCACTC | Cloning <i>MIR156F</i> promoter into pLacZi2 $\mu$ vector for Y1H |
| U12       | TCGACAGATCCCCGGGCCATCAATTCCTCACCACCTC       |                                                                   |
| U13       | ATTCGAGCTCGGTACCCGGG CTGTGAAGTACATAATGGCTG  | Cloning <i>MIR156G</i> promoter into pLacZi2 $\mu$ vector for Y1H |
| U14       | TCGACAGATCCCCGGGTGCTATTCCCTTACCTCCTTTAG     |                                                                   |
| U15       | ATTCGAGCTCGGTACCCGGG ATCTGCTTCTTCAGTCAATTC  | Cloning <i>MIR156H</i> promoter into pLacZi2 $\mu$ vector for Y1H |
| U16       | TCGACAGATCCCCGGGCTTCTTCTCGGGAGGAATAGAAG     |                                                                   |
| U17       | CGAGCTCGGTACCCGGGGAACCATGCATCTGATTTACAG     | Cloning <i>SPL2</i> promoter into pLacZi2 $\mu$ vector for Y1H    |
| U18       | GTCGACAGATCCCCGGGGTTCATATTAAGTGTCTG         |                                                                   |
| U19       | CGAGCTCGGTACCCGGGTATTCAATTAACGTTGCTCG       | Cloning <i>SPL3</i> promoter into pLacZi2 $\mu$ vector for Y1H    |
| U20       | GTCGACAGATCCCCGGGGAGAAACTGAGAAACACTGTG      |                                                                   |
| U21       | CGAGCTCGGTACCCGGGACCCATAGGTTATGTAAGTTAC     | Cloning <i>SPL4</i> promoter into pLacZi2 $\mu$ vector for Y1H    |
| U22       | GTCGACAGATCCCCGGGAACCTAGGATCTGATCACTG       |                                                                   |
| U23       | CGAGCTCGGTACCCGGGGATTCTTTCTTTAGCTGGTC       | Cloning <i>SPL5</i> promoter into pLacZi2 $\mu$ vector for Y1H    |
| U24       | GTCGACAGATCCCCGGGGTGACATCCTTTGTGATGTAG      |                                                                   |
| U25       | CGAGCTCGGTACCCGGGGGTATAGTTGGATGTTCTATGGC    | Cloning <i>SPL9</i> promoter into pLacZi2 $\mu$ vector for Y1H    |
| U26       | GTCGACAGATCCCCGGGGTTCAGTTCAACGTACACG        |                                                                   |
| U27       | CGAGCTCGGTACCCGGGCATGGCGTTCTGAAACTCACTC     | Cloning <i>SPL15</i> promoter into pLacZi2 vector for Y1H         |
| U28       | GTCGACAGATCCCCGGGGACAGAGAAAGAGATGCTTC       |                                                                   |
| AD1       | GGAGGCCAGTGAATTCATGCATCATTTTGTCCCTGAC       | Cloning <i>PIF1</i> coding region into pGADT7 vector for Y2H      |
| AD2       | CACCCGGGTGGAATCTTAACCTGTTGTGTGGTTTC         |                                                                   |
| AD3       | GGAGGCCAGTGAATTCATGCCTCTGTTTGTAGCTTTTC      | Cloning <i>PIF3</i> coding region into                            |

|       |                                                                                                          |                                                               |
|-------|----------------------------------------------------------------------------------------------------------|---------------------------------------------------------------|
| AD4   | CACCCGGGTGGAATTCTCACGACGATCCACAAAAGT                                                                     | pGADT7 vector for Y2H                                         |
| AD5   | GGAGGCCAGTGAATTCATGGAACACCAAGGTTGGAG                                                                     | Cloning <i>PIF4</i> coding region into                        |
| AD6   | CACCCGGGTGGAATTCTCTAGTGGTCCAAACGAGAACCG                                                                  | pGADT7 vector for Y2H                                         |
| AD7   | GGAGGCCAGTGAATTCATGGAACAAGTGTGTTGCTG                                                                     | Cloning <i>PIF5</i> coding region into                        |
| AD8   | CACCCGGGTGGAATTCTCAGCCTATTTACCCATATG                                                                     | pGADT7 vector for Y2H                                         |
| BK1   | CATGGAGGCCGAATTCATGGAGTGTAAATGCAAAGC                                                                     | Cloning <i>SPL2</i> coding region into                        |
| BK2   | GGATCCCCGGGAATTCAGTTATAAACTGGTTCA                                                                        | pGBKT7 vector for Y2H                                         |
| BK3   | CATGGAGGCCGAATTCATGAGTATGAGAAGAAGCAAAG                                                                   | Cloning <i>SPL3</i> coding region into                        |
| BK4   | GGATCCCCGGGAATTCCTAGTCAGTTGTGCTTTTC                                                                      | pGBKT7 vector for Y2H                                         |
| BK5   | CATGGAGGCCGAATTCATGGAGGGTAAGAGATCAC                                                                      | Cloning <i>SPL4</i> coding region into                        |
| BK6   | GGATCCCCGGGAATTCCTATCTAATCTGTGGTCGC                                                                      | pGBKT7 vector for Y2H                                         |
| BK7   | CATGGAGGCCGAATTCATGGAGGGTCAGAGAACAC                                                                      | Cloning <i>SPL5</i> coding region into                        |
| BK8   | GGATCCCCGGGAATTCCTATCTGATCTGTGGTCGCTTG                                                                   | pGBKT7 vector for Y2H                                         |
| BK9   | CATGGAGGCCGAATTCATGGAGATGGGTTCCAACTC                                                                     | Cloning <i>SPL9</i> coding region into                        |
| BK10  | GGATCCCCGGGAATTCAGAGAGACCAGTTGGTATG                                                                      | pGBKT7 vector for Y2H                                         |
| BK11  | CATGGAGGCCGAATTCATGGACTGCAACATGGTATC                                                                     | Cloning <i>SPL10</i> coding region into                       |
| BK12  | GGATCCCCGGGAATTCAGATGAAATGACTAGGG                                                                        | pGBKT7 vector for Y2H                                         |
| BK13  | CATGGAGGCCGAATTCATGGACTGCAACATGGTATC                                                                     | Cloning <i>SPL11</i> coding region into                       |
| BK14  | GGATCCCCGGGAATTCCTATTTTGGTACAACATCAT                                                                     | pGBKT7 vector for Y2H                                         |
| BK15  | CATGGAGGCCGAATTCATGGAGTTGTTAATGTGTTTC                                                                    | Cloning <i>SPL15</i> coding region into                       |
| BK16  | GGATCCCCGGGAATTCCAAAGAGACCAATTGAAATG                                                                     | pGBKT7 vector for Y2H                                         |
| Mut01 | ACATGATGTTTTGTCAAAAAAGGGTTTAGAAGATTTCTAAGGTC<br>ATCTTACAGTGAGTGGGTGTTAATTAACCTCATTAAAGT                  | Mutagenesis of the G-box of<br><i>MIR156B</i> promoter        |
| Mut02 | ACTTTAATGAAGTTAATTAACACCCACTCACTGTAAGATGACC<br>TTAGAAATCTTCTAAACCTTTTTTGACAAAACATCATGT                   |                                                               |
| Mut03 | AAATTAATTTTCTAATTAAACTCTTCAAGTAAAATAATAAC<br>AGGTCATTGCATGAAAATCTTTTCAACGTCCGTTTTCGTTTCTA<br>AAACGC      | Mutagenesis of the G-box of<br><i>MIR156D</i> promoter        |
| Mut04 | GCGTTTTAGAAAACGAAAACGGACGTTGAAAAGAATTTTCATGC<br>AATGACCTGTTATTAGTTTCACTTGAAAGAGTTAATTAGAAAA<br>ATTAATATT |                                                               |
| Mut05 | CGTGGTCAGCCCCTGAGGAGAAGGTCAGTGGGAACGAATATGC<br>CGCC                                                      | Mutagenesis of the first G-box of<br><i>MIR156E</i> promoter  |
| Mut06 | GGGCGGCATATTCGTTCCCACTGACCTTCTCCTAGGGGCTGAC<br>CACG                                                      |                                                               |
| Mut07 | CTTCCACTTTCGGCGTGGGAATAGGTCAGTCAGCCCCTGAGG<br>AGACACGTG                                                  | Mutagenesis of the second G-box of<br><i>MIR156E</i> promoter |
| Mut08 | CACGTGTCTCTCAGGGGCTGACTGACCTATCCCACGCCGAA<br>AGTGGAAG                                                    |                                                               |
| Mut09 | GAGAATGCCAGCCTGTAGGTCATCGTAATGGGTTTTGTTCGTC<br>GTCCAACCCTA                                               | Mutagenesis of the G-box of<br><i>MIR156F</i> promoter        |
| Mut10 | TAGGGTTGACGACGAACAAACCCCAATTACGATGACCTACAGG                                                              |                                                               |

|       |                                                                                 |                                                                        |
|-------|---------------------------------------------------------------------------------|------------------------------------------------------------------------|
|       | CTGGGCATCTC                                                                     |                                                                        |
| Mut11 | TACAGGGCCCACTTTTTATTTTCGTC AATAGGAGGTCATTGATTTA<br>GATTGACACGAGTCGAGTATATAGATAG | Mutagenesis of the G-box of <i>MIR156H</i> promoter                    |
| Mut12 | CTATCTATATACTCGACTCGTGTCAATCTAAATCAATGACCTCCTA<br>TTGACGAAATAAAAAGTGGGCCCTGTA   |                                                                        |
| GUS01 | TTGCATGCCTGCAGGTCGACATAAGTGCAGAGTCTAAGAC                                        | Cloning <i>MIR156B</i> promoter into pBI101 vector                     |
| GUS02 | GGGGATCCTCTAGAGTCGACGTTTTCTCTGTTGCATTCCTC                                       |                                                                        |
| GUS03 | TTGCATGCCTGCAGGTCGACTAACTCTCTCTCTCTCTCTC                                        | Cloning <i>MIR156D</i> promoter into pBI101 vector                     |
| GUS04 | GGGGATCCTCTAGAGTCGACTTCTTTTCCCCCATCAACA                                         |                                                                        |
| GUS05 | TTGCATGCCTGCAGGTCGACCTCAACATTTCCGGTTGACTAC                                      | Cloning <i>MIR156E</i> promoter into pBI101 vector                     |
| GUS06 | GGGGATCCTCTAGAGTCGACCCTCCTAATTACCTTTCACAC                                       |                                                                        |
| GUS07 | TTGCATGCCTGCAGGTCGACGACACATCCACAACCACCACTC                                      | Cloning <i>MIR156F</i> promoter into pBI101 vector                     |
| GUS08 | GGGGATCCTCTAGAGTCGACCCATCAATTCCTCACCACCTC                                       |                                                                        |
| GUS09 | TTGCATGCCTGCAGGTCGACATCTGCTTCTTCAGTCAATTC                                       | Cloning <i>MIR156H</i> promoter into pBI101 vector                     |
| GUS10 | GGGGATCCTCTAGAGTCGACCTTCTTCTCGGGAGGAATAGAAG                                     |                                                                        |
| OE01  | GATCCCCGGGTACCGAGCTCAGAAGAGGGAGAGATGGTGA                                        | Cloning <i>MIR156B</i> fragment into pCPB1-1 vector for overexpression |
| OE02  | GATCGGGGAAATTCGAGCTCTCAAGCAGGCAGAGATAGG                                         |                                                                        |
| OE03  | GATCCCCGGGTACCGAGCTCCATCGGTTTCTGGACTAATTG                                       | Cloning <i>MIR156D</i> fragment into pCPB1-1 vector for overexpression |
| OE04  | GATCGGGGAAATTCGAGCTCCATAACTAGAACAAATGGAATAAG                                    |                                                                        |
| OE05  | GATCCCCGGGTACCGAGCTCCAAAGATAGAAAGATGTAAGGTC                                     | Cloning <i>MIR156E</i> fragment into pCPB1-1 vector for overexpression |
| OE06  | GATCGGGGAAATTCGAGCTCGCTTCATCGTACGTTATAGATC                                      |                                                                        |
| OE07  | GATCCCCGGGTACCGAGCTCGGTATCCGTATATCTCTATAT                                       | Cloning <i>MIR156F</i> fragment into pCPB1-1 vector for overexpression |
| OE08  | GATCGGGGAAATTCGAGCTCCTAAATGAAATGCTGTAGAGAG                                      |                                                                        |
| OE09  | GATCCCCGGGTACCGAGCTCGAAGAGGTAAGAAAGTGAAGG<br>GA                                 | Cloning <i>MIR156H</i> fragment into pCPB1-1 vector for overexpression |
| OE10  | GATCGGGGAAATTCGAGCTCTCTCAGAATCTTGAACAAAAGC                                      |                                                                        |
| Q01   | GTAAAACTCAGATCTAACACAAAAG                                                       | qPCR of primary <i>MIR156A</i>                                         |
| Q02   | GAGAACGAAGACAGGCCAAAAG                                                          |                                                                        |
| Q03   | AGAGGGAGAGATGGTGATTGAGGAATG                                                     | qPCR of primary <i>MIR156B</i>                                         |
| Q04   | GAGAGGTCAAGCAGGCAGAGATAGG                                                       |                                                                        |
| Q05   | ACTCCAACACCTTCAAAGTCTGC                                                         | qPCR of primary <i>MIR156C</i>                                         |
| Q06   | GAGAGAGAAAAGTGAGAGATGGGAAC                                                      |                                                                        |
| Q07   | CAGAAGAGAGTGAGCACACAAAAGGG                                                      | qPCR of primary <i>MIR156D</i>                                         |
| Q08   | GTGAGCACGCAAAAGCAACCATATAC                                                      |                                                                        |
| Q09   | GGTCTAGAGTCTTGTTCTTAATCCCC                                                      | qPCR of primary <i>MIR156E</i>                                         |
| Q10   | CCTAATTACCTTTCACACTCTACGC                                                       |                                                                        |
| Q11   | TGGTGAGGAATTGATGGTGACA                                                          | qPCR of primary <i>MIR156F</i>                                         |
| Q12   | CCTTCAAATATGCAAGAAAGCCAC                                                        |                                                                        |
| Q13   | GGGACCGAGGCTAATATAACATCAA                                                       | qPCR of primary <i>MIR156G</i>                                         |
| Q14   | ATGCTAGAAAAAGAGCCATGTGTGC                                                       |                                                                        |
| Q15   | AGCACAACCTGGGATTAGCAAA                                                          | qPCR of primary <i>MIR156H</i>                                         |

|     |                           |                                     |
|-----|---------------------------|-------------------------------------|
| Q16 | AACATACGTCATGACACGATCA    |                                     |
| Q17 | CGCTGACAGAAGAGAGTGAGCAC   | qPCR of mature <i>MIR156</i>        |
| Q18 | AGATTTCCGATACCGAGCACA     | qPCR of <i>SPL2</i>                 |
| Q19 | TTGGAGGTTGCTTGAGGGATG     |                                     |
| Q20 | ACCGCGGATATGAGCAAAGCCA    | qPCR of <i>SPL3</i>                 |
| Q21 | GAGCGCGTGAAACCTGCTGC      |                                     |
| Q22 | TGGAGAAGGATCAGGTCGGAGAGG  | qPCR of <i>SPL4</i>                 |
| Q23 | CAGAGTGACCGTGGCTTTTGGT    |                                     |
| Q24 | GGTCAGAGAACACAACGCCGGG    | qPCR of <i>SPL5</i>                 |
| Q25 | CCTGGCACAGTCGCGATGGA      |                                     |
| Q26 | CCACGGAAGTATCCTCCATTT     | qPCR of <i>SPL6</i>                 |
| Q27 | TATTCCTGCTTCACATCACCA     |                                     |
| Q28 | CAGGCAGACTGTTACCAGA       | qPCR of <i>SPL7</i>                 |
| Q29 | AGTTTGACGGGACCTGAATG      |                                     |
| Q30 | CAAGGTTCAAGTTGGTGGAGGA    | qPCR of <i>SPL9</i>                 |
| Q31 | TGAAGAAGCTCGCCATGTATTG    |                                     |
| Q32 | AGCACCTCTCTTTCTCTGCGT     | qPCR of <i>SPL10</i>                |
| Q33 | CGGCCACGGGAGTGTGTTGAT     |                                     |
| Q34 | CACTTATGATAAAAGCCTAGACAA  | qPCR of <i>SPL11</i>                |
| Q35 | GGGGATCCGAAGAGGTTGACA     |                                     |
| Q36 | GGGAAATAGTCTTGTAAGCGTTGC  | qPCR of <i>SPL13</i>                |
| Q37 | TGGGACAAAAGAAAGTGGTGGT    |                                     |
| Q38 | GTGGTCAACCGCAAGATCAGT     | qPCR of <i>SPL15</i>                |
| Q39 | TGAGCCATTGTAACCTTATCG     |                                     |
| Q40 | TATCGGATGACGATTTCTCGTGCAG | qPCR of <i>PP2A</i>                 |
| Q41 | GCTTGGTCGACTATCGGAATGAGAG |                                     |
| Q42 | AACACCCACTCACTGTAAG       | ChIP-PCR of <i>MIR156B</i> fragment |
| Q43 | GAGGATGGTAGATAGGAGC       |                                     |
| Q44 | TAGGGTTTTGGAGAGATCTG      | ChIP-PCR of <i>MIR156B</i> fragment |
| Q45 | GCCAAATTTGAGAGAGAGAG      |                                     |
| Q46 | CTTCCTTATCCATTGTTT        | ChIP-PCR of <i>MIR156D</i> fragment |
| Q47 | TTGTGTCTTATCTGTCTC        |                                     |
| Q48 | ATCTGTACTTGTGTCATG        | ChIP-PCR of <i>MIR156D</i> fragment |
| Q49 | GAGAGTGAGCACGCAAAAGC      |                                     |
| Q50 | ATGAGATGACCCACTTGAC       | ChIP-PCR of <i>MIR156E</i> fragment |
| Q51 | TGACCACAGACAGAACAAG       |                                     |
| Q52 | CGACAGGTCTCAGTTTCTTC      | ChIP-PCR of <i>MIR156E</i> fragment |
| Q53 | GTGACAGAGAGAGAGTAAGC      |                                     |
| Q54 | AACACAAACCGAAACCCAC       | ChIP-PCR of <i>MIR156F</i> fragment |
| Q55 | ATCTTGTGATGGTTATGGG       |                                     |
| Q56 | AGGTATCCGTATATCTCTA       | ChIP-PCR of <i>MIR156F</i> fragment |
| Q57 | GAGAAGGGGGTGACGGATAG      |                                     |
| Q58 | TTGCTCTCTCTCGCCACAAG      | ChIP-PCR of <i>MIR156H</i> fragment |

|      |                                                                 |                                                         |
|------|-----------------------------------------------------------------|---------------------------------------------------------|
| Q59  | GTCGGAAGTTGCTTTCACG                                             |                                                         |
| Q60  | CTATCACACACTATAGCCG                                             | ChIP-PCR of <i>MIR156H</i> fragment                     |
| Q61  | CGCAATGATGGTGGCAGAAG                                            |                                                         |
| Q62  | CAACGAACAAATCACAGAAAACATG                                       |                                                         |
| Q63  | AAAGGTAAAGAAGACAGCAACGAATT                                      | ChIP-PCR of <i>PP2A</i>                                 |
| P01  | TGGATCCCCGGAATTCGAAGTTCATAATCTCTCAGAAAGG                        | Cloning <i>PIF5</i> bHLH domain into pGEX-4T-1 vector   |
| P02  | GTCGACCCGGGAATTCTCATTGGAGTTGCATTTGAAGTGAT                       |                                                         |
| S01  | GATCCATCGATAGTACTGTCGACATGCATCATTTTGTCCCTGAC                    | Cloning <i>PIF1</i> coding region into pSPYCE vector    |
| S02  | GGAGCGGTACCCTCGAGGTCGACTTAACCTGTTGTGTGGTTTC                     |                                                         |
| S03  | GATCCATCGATAGTACTGTCGACATGCCTCTGTTGAGCTTTTC                     | Cloning <i>PIF3</i> coding region into pSPYCE vector    |
| S04  | GGAGCGGTACCCTCGAGGTCGACTCAGACGATCCACAAAAC<br>G                  |                                                         |
| S05  | GATCCATCGATAGTACTGTCGACATGGAACACCAAGGTTGGAG                     | Cloning <i>PIF4</i> coding region into pSPYCE vector    |
| S06  | GGAGCGGTACCCTCGAGGTCGACCTAGTGGTCCAAACGAGAAC<br>CG               |                                                         |
| S07  | GATCCATCGATAGTACTGTCGACATGGAACAAGTGTTTGCTG                      | Cloning <i>PIF5</i> coding region into pSPYCE vector    |
| S08  | GGAGCGGTACCCTCGAGGTCGACTCAGCCTATTTACCCATATG                     |                                                         |
| GR01 | GAGATCGAATTCATGGATAAGTGCAGAGTCTAAGAC                            | Cloning <i>MIR156B</i> promoter into pGREEN 0800 vector |
| GR02 | TTTTGGCGTCTTCCATGGTTTTCTCTGTTGCATTCCTC                          |                                                         |
| GR03 | GAGATCGAATTCATGGATGCGTGTGTGTTGTGTC                              | Cloning <i>MIR156D</i> promoter into pGREEN 0800 vector |
| GR04 | TTTTGGCGTCTTCCATGGCACAAGTACAGATCGAAGG                           |                                                         |
| GR05 | GAGATCGAATTCATGGCTCAACATTTCCGGTTGAC                             | Cloning <i>MIR156E</i> promoter into pGREEN 0800 vector |
| GR06 | TTTTGGCGTCTTCCATGGCCTCCTAATTACCTTTCAC                           |                                                         |
| GR07 | GAGATCGAATTCATGGACACATCCACAACCACCACTC                           | Cloning <i>MIR156F</i> promoter into pGREEN 0800 vector |
| GR08 | TTTTGGCGTCTTCCATGGCCATCAATTCCTCACCCTC                           |                                                         |
| GR09 | GAGATCGAATTCATGGATCTGCTTCTTCAGTCAATTC                           | Cloning <i>MIR156H</i> promoter into pGREEN 0800 vector |
| GR10 | TTTTGGCGTCTTCCATGGCTTCTCTCGGGAGGAATAG                           |                                                         |
| E01  | CATATTCGTTCCACCACGTGTCTCCTCAGGGGCTGACCACGTG<br>ATTCCACGCCGAAAG  | Probe for <i>MIR156E</i> EMSA                           |
| E02  | CTTTCGGCGTGGAATCACGTGGTCAGCCCCTGAGGAGACACG<br>TGGTGGGAACGAATATG |                                                         |
| E03  | CATATTCGTTCCCACTGACCTTCTCCTCAGGGGCTGACTGACCT<br>ATTCCACGCCGAAAG | Mutant probe for <i>MIR156E</i> EMSA                    |
| E04  | CTTTCGGCGTGGAATAGGTCAGTCAGCCCCTGAGGAGAAGGT<br>CAGTGGGAACGAATATG |                                                         |
| E05  | AACAAACCCCATACGACACGTGACAGGCTGGGCATTCTCCAC<br>ATGCTTCTTGCCGAAA  | Probe for <i>MIR156F</i> EMSA                           |
| E06  | TTTCGGCAAGAAAGCATGTGGAGAATGCCAGCCTGTCACGTG<br>TCGTAATGGGGTTTGT  |                                                         |
| E07  | AACAAACCCCATACGATGACCTACAGGCTGGGCATTCTCCACA<br>TGCTTCTTGCCGAAA  | Mutant probe for <i>MIR156F</i> EMSA                    |
| E08  | TTTCGGCAAGAAAGCATGTGGAGAATGCCAGCCTGTTGACCT<br>TCGTAATGGGGTTTGT  |                                                         |

**Supplementary Table 2. The number of G-box or PBE in putative *SPL* promoters**

|        | Length  | G-box (5' CACGTG3') | PBE (5' CACATG3') |
|--------|---------|---------------------|-------------------|
| pSPL2  | 3257 bp | 1                   | 2                 |
| pSPL3  | 2917 bp | 1                   | 2                 |
| pSPL4  | 3077 bp | 1                   | 2                 |
| pSPL5  | 2744 bp | 1                   | 0                 |
| pSPL9  | 3021 bp | 0                   | 5                 |
| pSPL10 | 1747 bp | 0                   | 0                 |
| pSPL11 | 2738 bp | 0                   | 0                 |
| pSPL15 | 1252 bp | 0                   | 1                 |

## Supplementary Figure 1

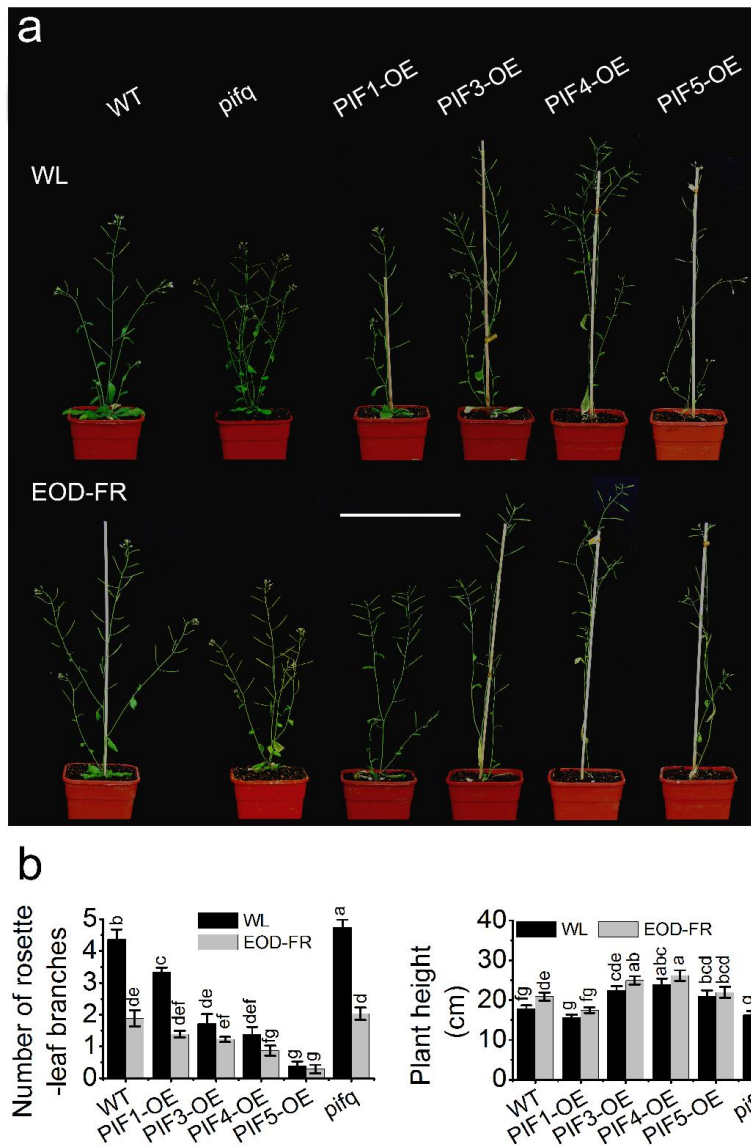

### Supplementary Figure 1. Phenotypic analysis of adult *PIF* overexpressors in response to simulated shade

(a) The plant height and rosette-leaf branches between the adult *PIF* overexpressors, *pifq* and wild type plants grown under normal high R:FR (WL) conditions and simulated shade (EOD-FR) conditions. Eight-day-old seedlings grown under WL were transferred into the soil under WL conditions with or without EOD-FR treatment for four weeks before phenotypic analysis. Bar=10 cm. (b) Quantification of plant height and rosette-leaf branches of the *PIF* overexpressors, *pifq* and wild type. Values given are means  $\pm$  SD (n=12). Different letters indicate significant differences by two-way ANOVA.



## Supplementary Figure 2

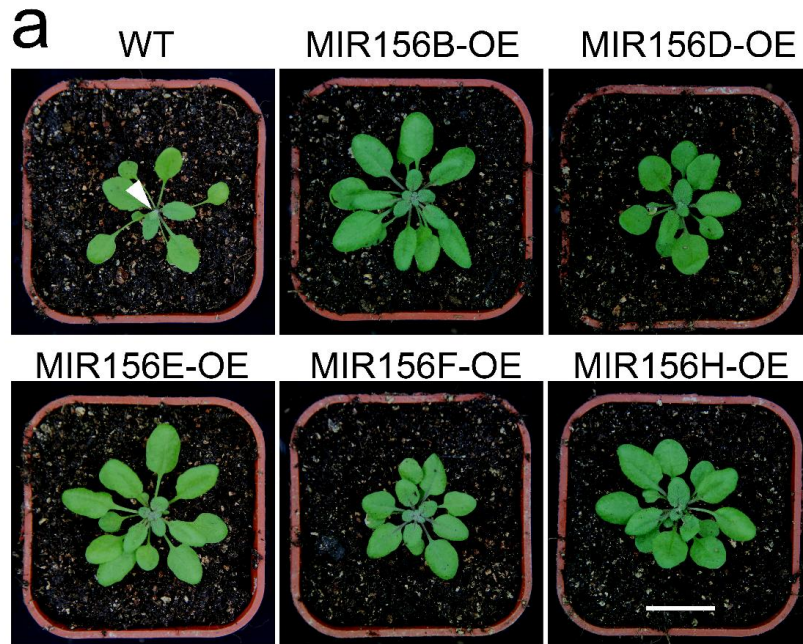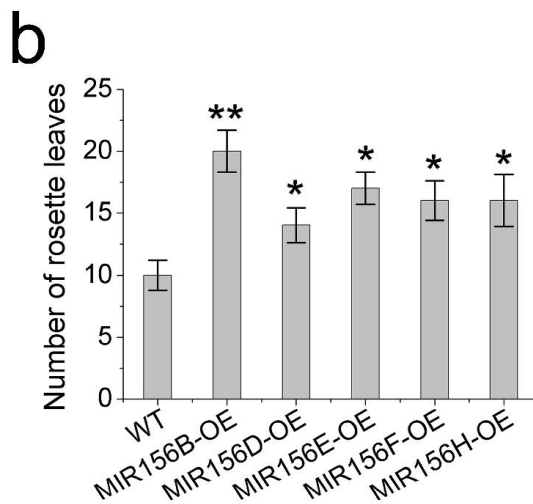

### Supplementary Figure 2. Overexpressors of *MIR156* members show similar phenotypes

Overexpressors of *MIR156B*, *MIR156D*, *MIR156E*, *MIR156F* and *MIR156H* shows more rosette leaves, prolonged expression of juvenile vegetative traits and late flowering compared with wild type. Values given are means  $\pm$  SD (n=12). \*P<0.05 and \*\*P<0.01 by a Student's *t*-test. Arrow indicates the bolting. Bar=2 cm.

Supplementary Figure 3

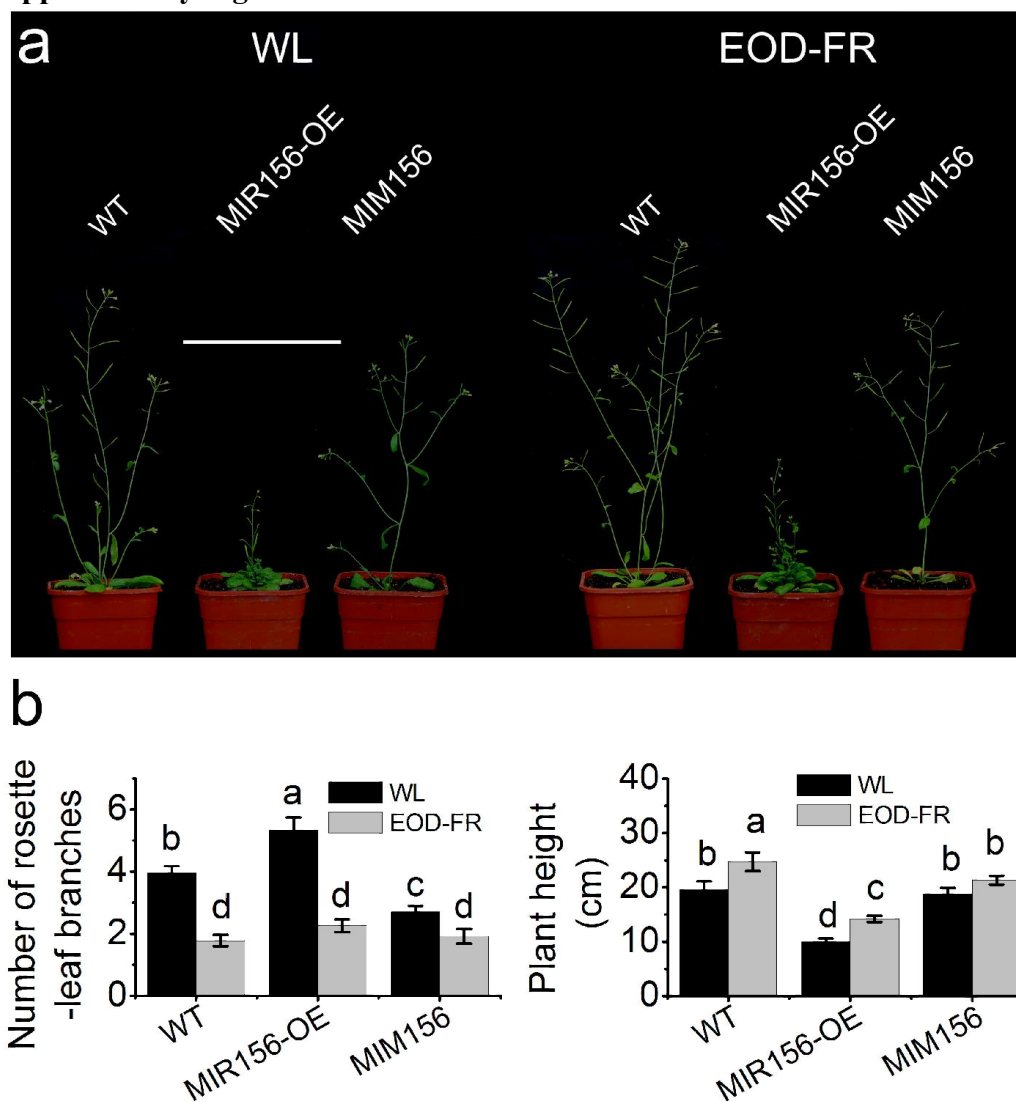

Supplementary Figure 3. Phenotypic analysis of *MIR156* overexpressor in response to simulated shade

(a) The plant height and rosette-leaf branches of *MIR156* overexpressor and wild type plants grown under high R:FR (WL) conditions or treated with EOD-FR. Eight-day-old seedlings grown under WL were transferred into the soil under WL conditions with or without EOD-FR treatment for four weeks before phenotypic examination. Bar=10 cm. (b) Quantification of plant height and rosette-leaf branches of *MIR156* overexpressor and wild type plants. Values given are means  $\pm$  SD (n=12). Different letters indicate significant differences by two-way ANOVA.

## Supplementary Figure 4

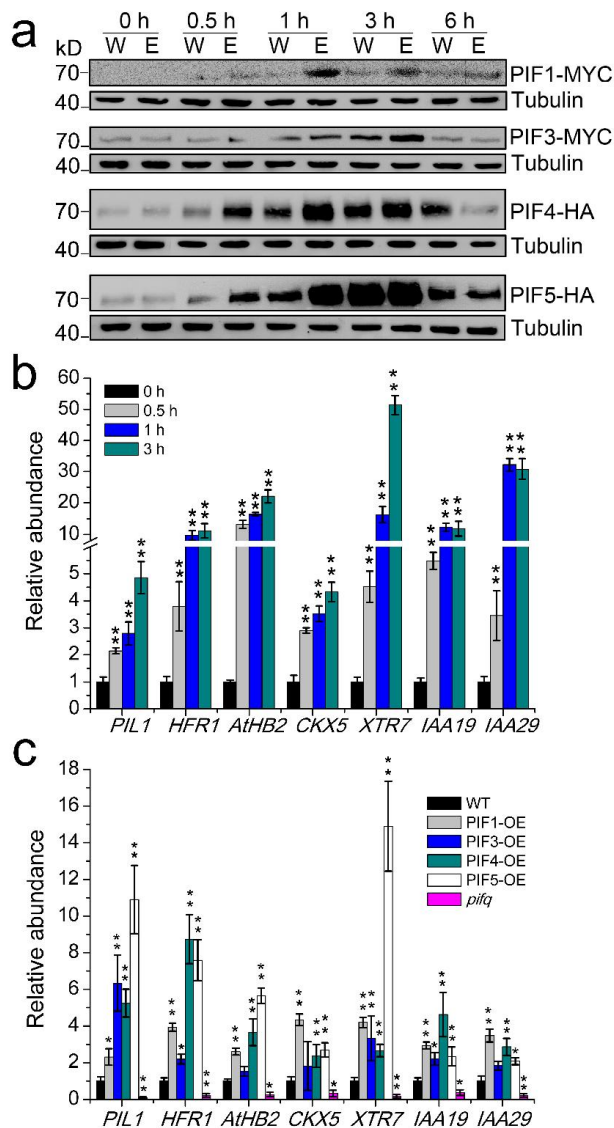

### Supplementary Figure 4. Increased accumulation of PIF proteins and up-regulation of representative shade-avoidance marker genes in response to EOD-FR treatment

(a) PIF protein accumulation in the PIF-OE lines rapidly increases when exposed to EOD-FR treatment. Two-week-old seedlings over-expressing MYC or HA -tagged PIF proteins (PIF1-MYC, PIF3-MYC, PIF4-HA and PIF5-HA) grown under normal high R:FR conditions were exposed to EOD-FR for 15 minutes and harvested at the given time points before immunoblot analysis. Tubulin was used as the internal control. W: white light; E: EOD-FR. (b) qRT-PCR showing that expression of shade-avoidance marker genes are up-regulated in response to the EOD-FR treatment.

Eight-day-old wild type seedling grown under high R:FR were treated with 15-minute EOD-FR and harvested at the given time points for RNA extraction. Values given are means  $\pm$  SD (n=3). \*P<0.05 and \*\*P<0.01 by a Student's *t* -test. (c) PIFs up-regulate the expression of shade-avoidance marker genes. The expression was determined by quantitative RT-PCR in 8-day-old seedlings grown under high R:FR conditions. *PP2A* was used as reference gene. Values given are means  $\pm$  SD (n=3). \*P<0.05 and \*\*P<0.01 by a Student's *t* -test.

## Supplementary Figure 5

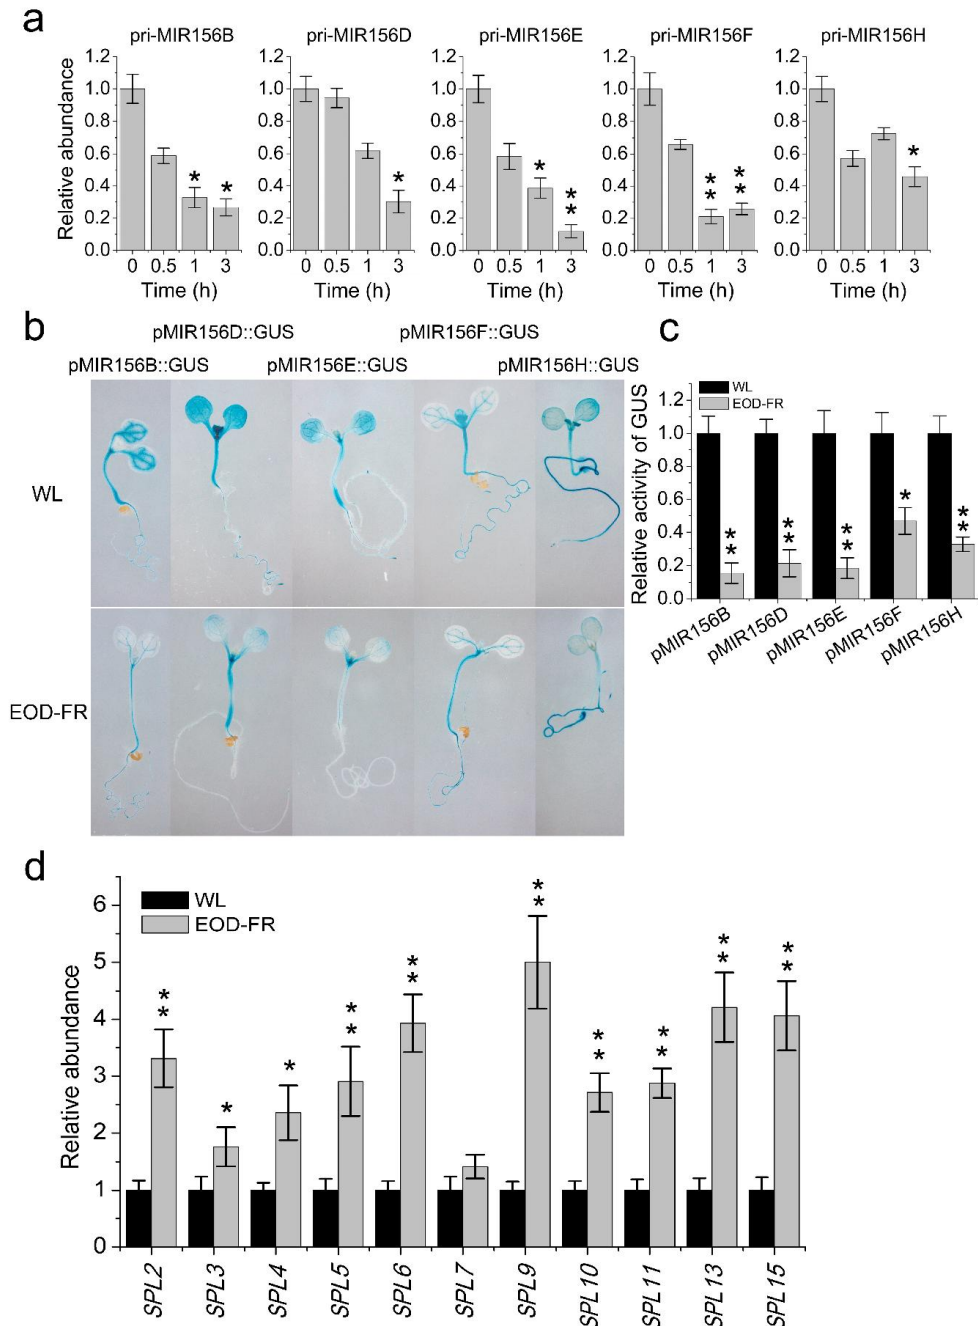

**Supplementary Figure 5. The primary transcript level of *MIR156* declines while several *MIR156* targeted *SPLs* increase when exposed to EOD-FR treatment**

(a) The relative expression levels of individual primary *MIR156* in 2-week-old wild type seedlings grown under WL or treated with EOD-FR. Values given are means  $\pm$  SD (n=3). \*P<0.05 and \*\*P<0.01 by a Student's *t*-test. (b) GUS staining of 8-day-old *pMIR156::GUS* seedlings grown under high R:FR conditions or treated with EOD-FR.

EOD-FR treatment led to a significant reduction of GUS staining in the seedlings. Bar=200  $\mu$ m. (c) Fluorometric quantification of GUS activity. Relative activity is normalized to the protein content in the plant extracts. Activities are plotted as percent of activity in the controls (WL). Homozygous T3 transgenic plants were used in the assay. Values given are means  $\pm$  SD (n=3). \*P<0.05 and \*\*P<0.01 by a Student's *t*-test. (d) Comparison of *SPL* genes expression levels between WL and EOD-FR conditions. Eight-day-old wild type seedlings grown under WL conditions were treated with or without EOD-FR for 6 days and then harvested for RNA extraction and quantitative RT-PCR analyses. Values given are means  $\pm$  SD (n=3). \*P<0.05 and \*\*P<0.01 by a Student's *t*-test.

## Supplementary Figure 6

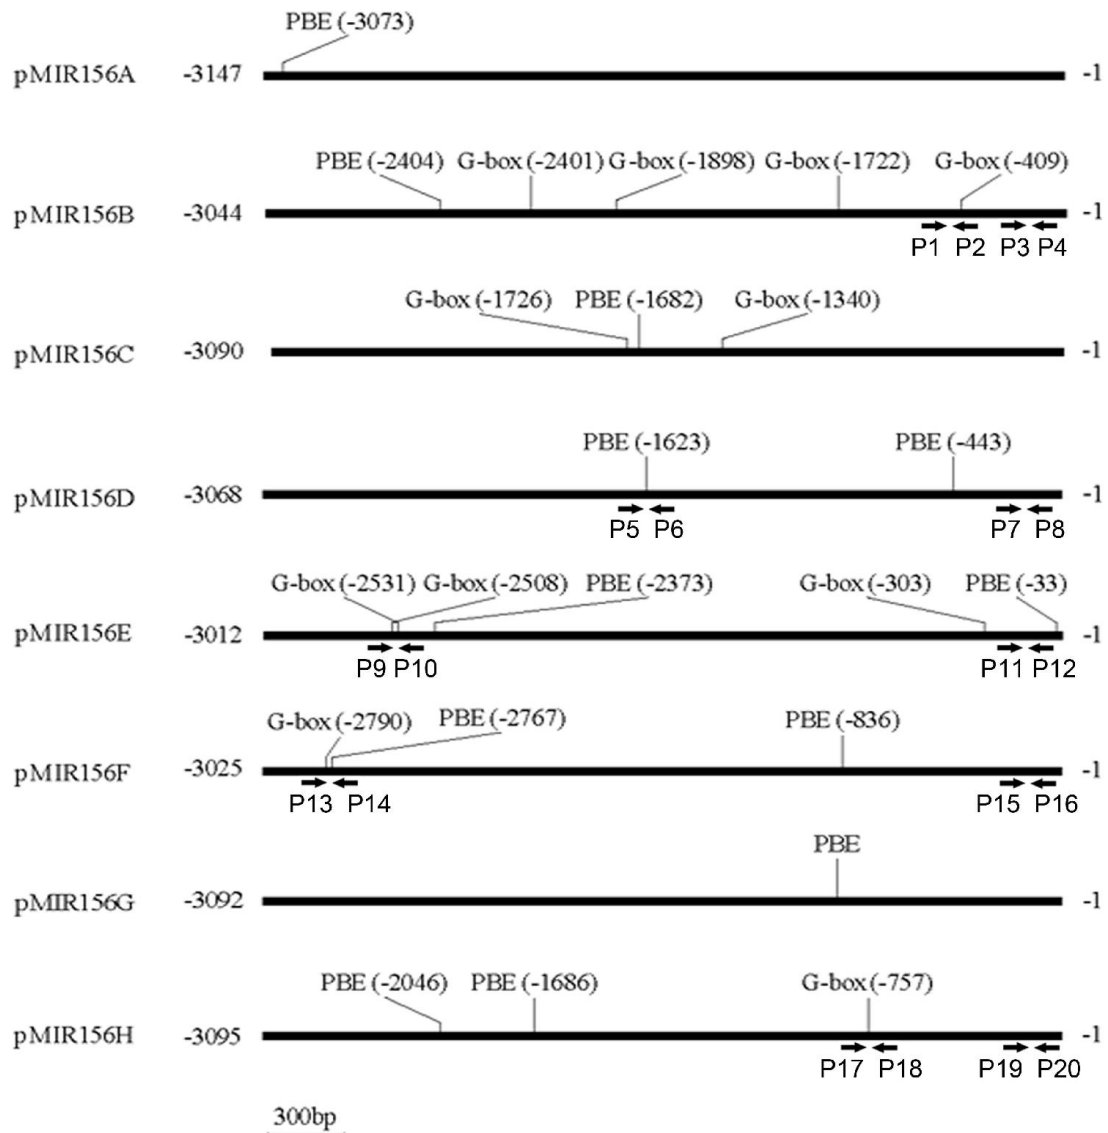

### Supplementary Figure 6. All putative *MIR156* promoters harbor the putative PIF binding elements (G-box or PBE-box)

Around 3-kb upstream promoter regions of each *MIR156* gene were obtained from TAIR (The Arabidopsis Information Resource, [www.arabidopsis.org](http://www.arabidopsis.org)) to search for the PIF binding site G-box (5'-CACGTG-3') or PBE-box (5'-CACATG-3'). The position of the first base of each mature *miR156* was designed +1 in this study. The arrow pairs indicate the fragments amplified by ChIP-PCR in this study.

## Supplementary Figure 7

**a**

|           |       |                                               |       |
|-----------|-------|-----------------------------------------------|-------|
| pMIR156B  | -428  | acaccactcactgtaagaCACGTGtagaaatctttaaaccctt   | -383  |
| pMIR156Bm | -428  | acaccactcactgtaagaTGACCTtagaaatctttaaaccctt   | -383  |
| pMIR156D  | -1622 | gaaaagaattttcatgcaaCACATGgttattagtttcacttgaaa | -1577 |
| pMIR156Dm | -1622 | gaaaagaattttcatgcaaTGACCTgttattagtttcacttgaaa | -1577 |
| pMIR156E  | -1542 | ttcgttcccacCACGTGtctcctcagggctgacCACGTGattec  | -2497 |
| pMIR156Em | -1542 | ttcgttcccacTGACCTtctcctcagggctgacTGACCTattec  | -2497 |
| pMIR156F  | -2809 | cgaacaaccccattacgaCACGTGacaggctgggcattctccac  | -2764 |
| pMIR156Fm | -2809 | cgaacaaccccattacgaTGACCTacaggctgggcattctccac  | -2764 |
| pMIR156H  | -776  | ctcgtgtcaatctaaatcaaCACGTGcctattgacgaataaaaa  | -731  |
| pMIR156Hm | -776  | ctcgtgtcaatctaaatcaaTGACCTcctattgacgaataaaaa  | -731  |

**b**

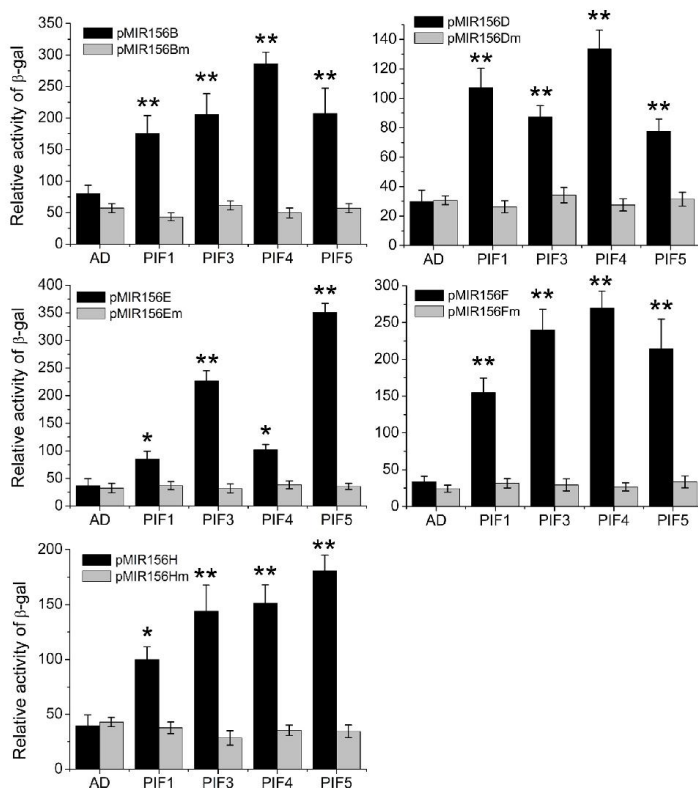

### Supplementary Figure 7. Mutagenesis of the G-box in the *MIR156* promoters and quantification of PIF binding activity.

(a) Mutagenesis of the G-box in the *MIR156* promoters. The G-box (5'-CACGTG-3') or PBE-box (5'-CACATG-3') was mutated into 5'-TGACCT-3' in this study. (b) Quantification of activity of PIF binding to *MIR156* promoters. At least 6 independent yeast clones were used for activity determination. Values given are means  $\pm$  SD ( $n \geq 6$ ). \*P < 0.05 and \*\*P < 0.01 by a Student's *t*-test.



### Supplementary Figure 8

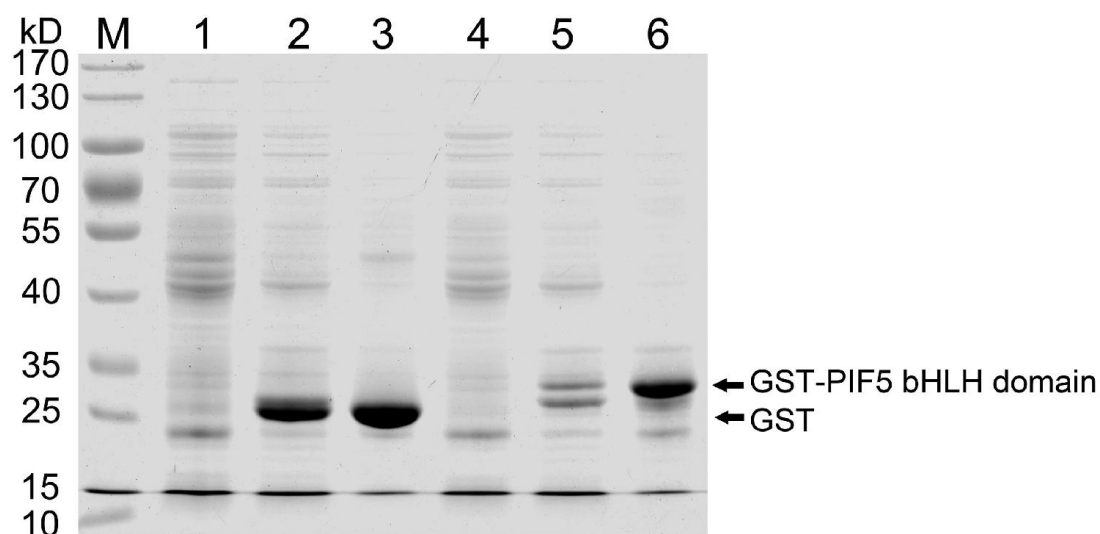

### Supplementary Figure 8. SDS-PAGE analysis of purified GST and recombinant GST-PIF5 bHLH domain proteins.

The truncated fragment of *PIF5* cDNA encoding the bHLH domain (52 aa, Glu<sub>259</sub>-Gln<sub>310</sub>) was PCR amplified and cloned into the vector GEX-4T-1 to generate pGEX-4T-PIF5 construct for GST-PIF5 bHLH domain fusion protein. M: molecular mass standard; Line 1 and 2: *Escherichia coli* BL21 (DE3) harboring GST without or with induction by IPTG, respectively; Line 3: purified GST proteins; Line 4-5: *Escherichia coli* BL21 (DE3) harboring recombinant GST-PIF5 bHLH domain without or with induction by IPTG, respectively; Line 6: purified recombinant GST-PIF5 bHLH domain proteins.

**Supplementary Figure 9**

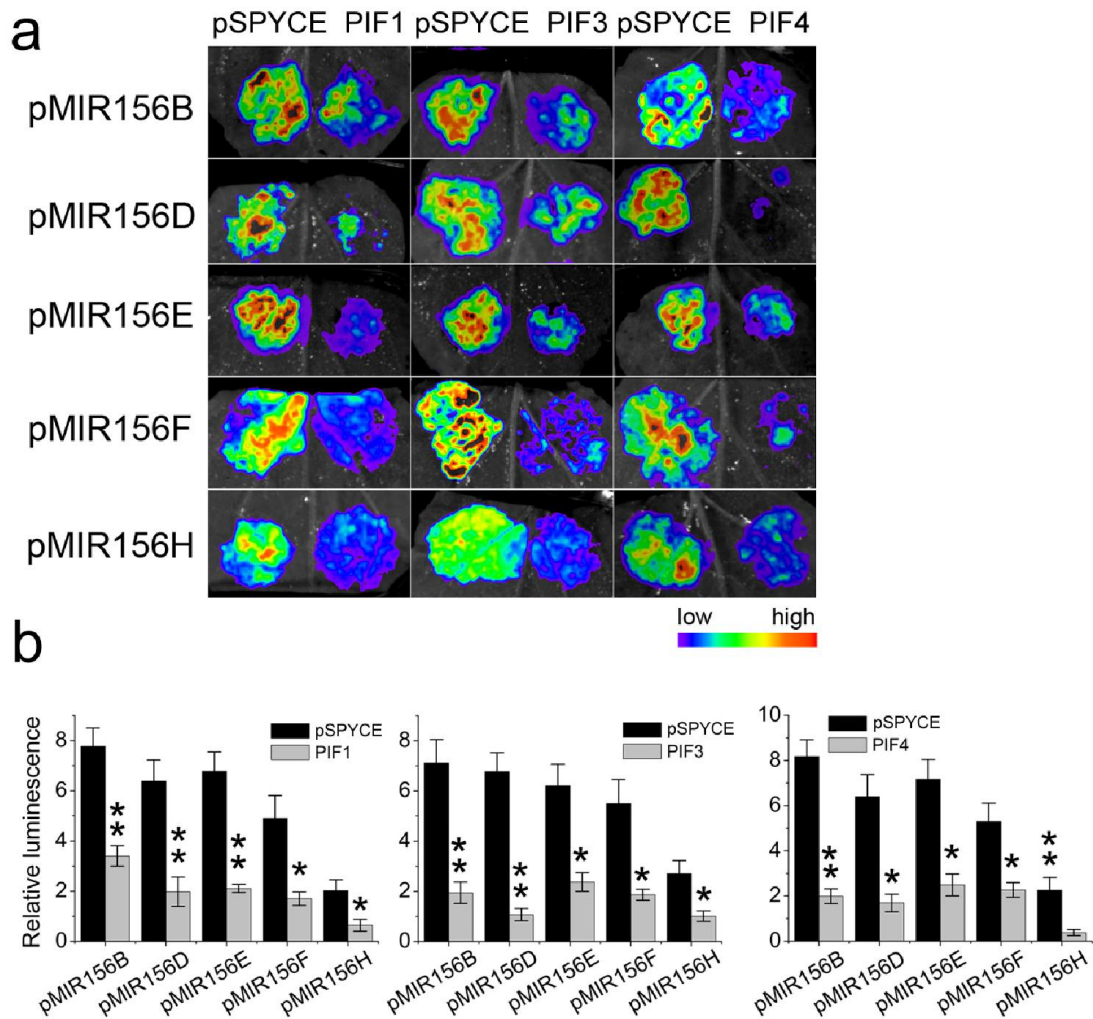

**Supplementary Figure 9. PIFs repress the expression of several *MIR156* genes.**

(a) PIF1, PIF3 and PIF4 repress the expression of *MIR156B*, *MIR156D*, *MIR156E*, *MIR156F* and *MIR156H* in transient expression assay. Representative images of *N. benthamiana* leaves 72 hours after infiltration are shown. (b) Quantitative analysis of luminescence intensity in (A). Five independent determinations were assessed. Values given are means  $\pm$  SD (n=5). \*P<0.05 and \*\*P<0.01 by a Student's *t*-test.

## Supplementary Figure 10

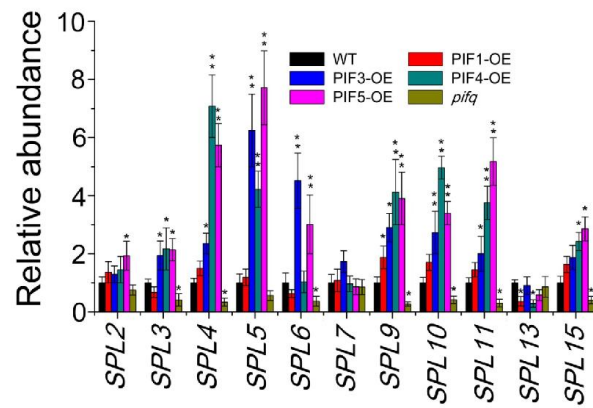

### Supplementary Figure 10. The transcript level of several *SPL* genes rise in the *PIF* overexpressors

Eight-day-old wild type, *PIF* overexpressors and *pifq* grown in normal WL conditions were harvested at the same time for RNA extraction and quantitative RT-PCR analyses. Values given represent means  $\pm$  SD (n=3). \*P<0.05 and \*\*P<0.01 by a Student's *t* -test.

## Supplementary Figure 11

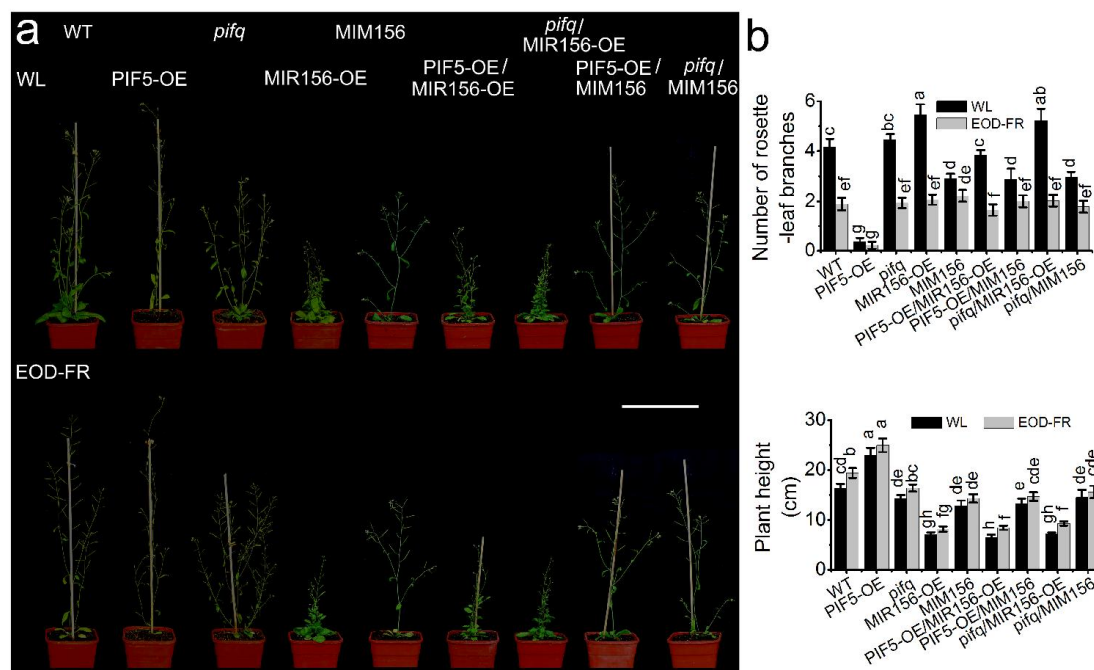

### Supplementary Figure 11. *MIR156s* act downstream of *PIFs* in regulating SAS

(a) The plant height and rosette-leaf branch number of the adult wild type, *PIF5-OE*, *pifq*, *MIR156-OE*, *MIM156*, and their higher order mutants grown under WL with or without EOD-FR treatment. Eight-day-old seedlings grown under WL were transferred into the soil under WL conditions with or without EOD-FR treatment for four weeks before phenotypic examination. Bar=10 cm. (b) Quantification of the plant height and rosette-leaf branch number of the adult wild type, *PIF5-OE*, *pifq*, *MIR156-OE*, *MIM156*, and their higher order mutants grown under WL with or without EOD-FR treatment. Values given are means  $\pm$  SD (n=12). Different letters indicate significant differences by two-way ANOVA.

## Supplementary Figure 12

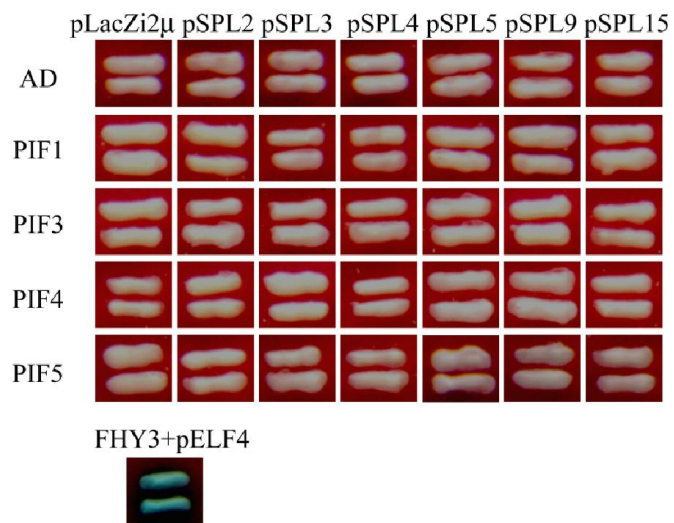

**Supplementary Figure 12. No direct binding of PIFs to *SPL* promoters was detected.**

Yeast one-hybrid assay showing that there was no direct binding of PIFs to the promoters of *miR156*-targeted *SPLs* genes. The binding of FHY3 to the *ELF4* promoter was used as a positive control (Li et al., 2011).

### Supplementary Figure 13

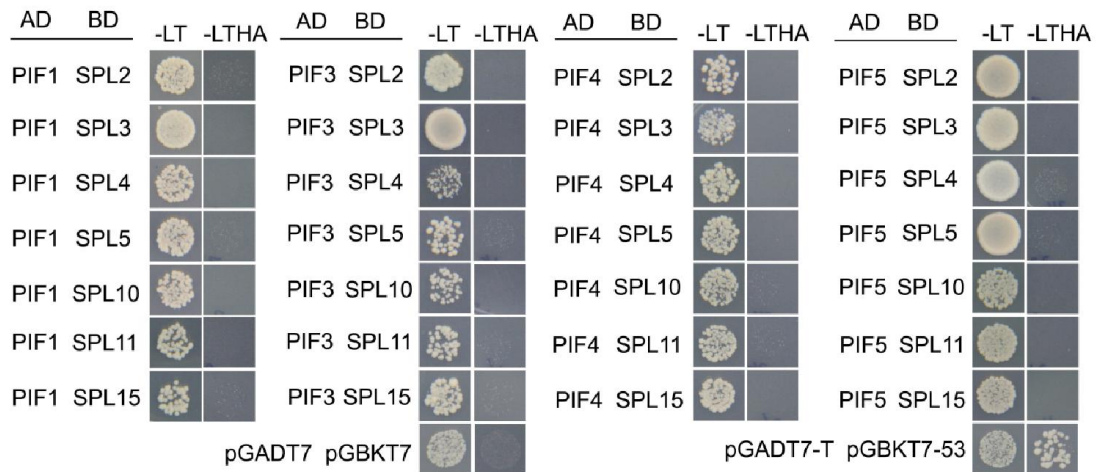

### Supplementary Figure 13. No interaction between PIFs and SPLs was detected.

Yeast two-hybrid assay showing that there was no interaction between PIFs and SPLs. Seven *miR156*-targeted SPLs were used in this assay. The interaction between pGADT7-T and pGBKT7-53 was used as a positive control.

## Supplementary Figure 14

### Supplementary Figure 4a

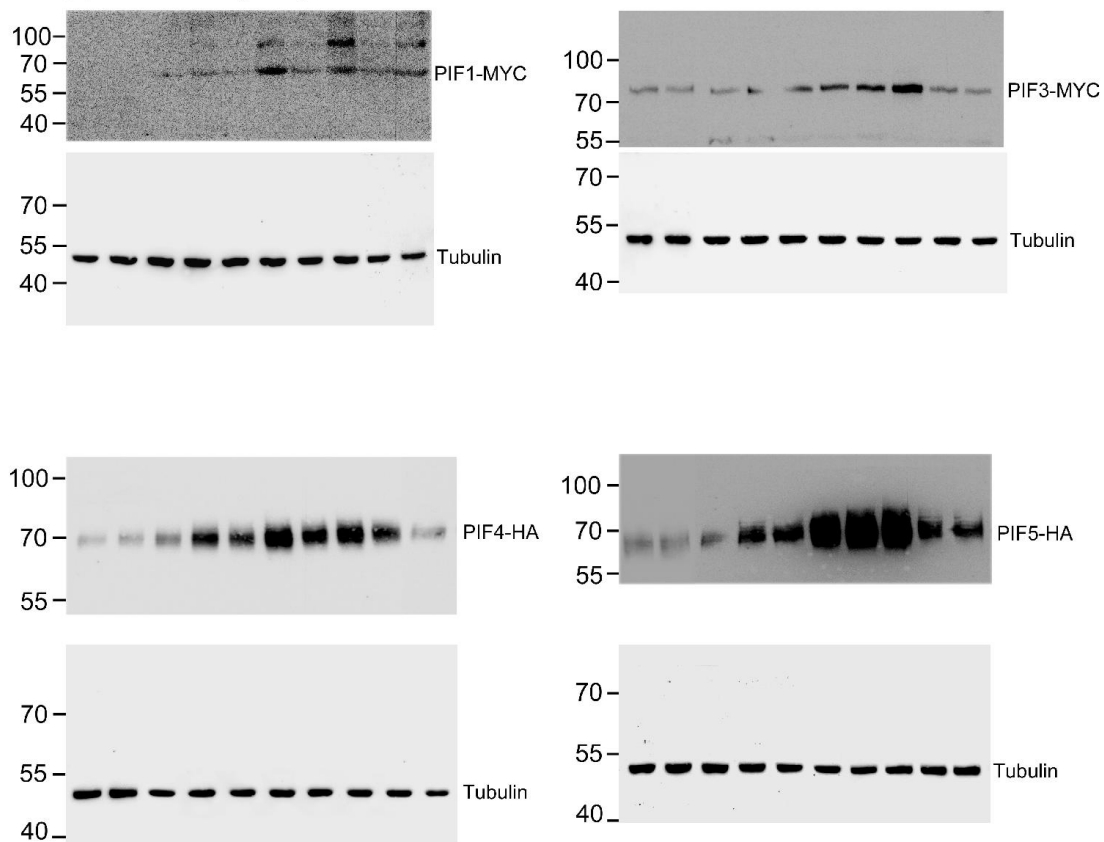

**Supplementary Figure 14. The original full images of immunoblots used to prepare figures.**

### **Supplementary Reference**

Li, G. *et al.* Coordinated transcriptional regulation underlying the circadian clock in *Arabidopsis*. *Nat Cell Biol.* **13**, 616–622 (2011).
